# Supplementary material for: PIK3CA mutations in androgen receptor-positive triple negative breast cancer confer sensitivity to the combination of PI3K and androgen receptor inhibitors
Source: Springer Nature journal article supplement (doi:10.1186/s13058-014-0406-x), 2014-08-07

Figure S4

MDA-MB-453

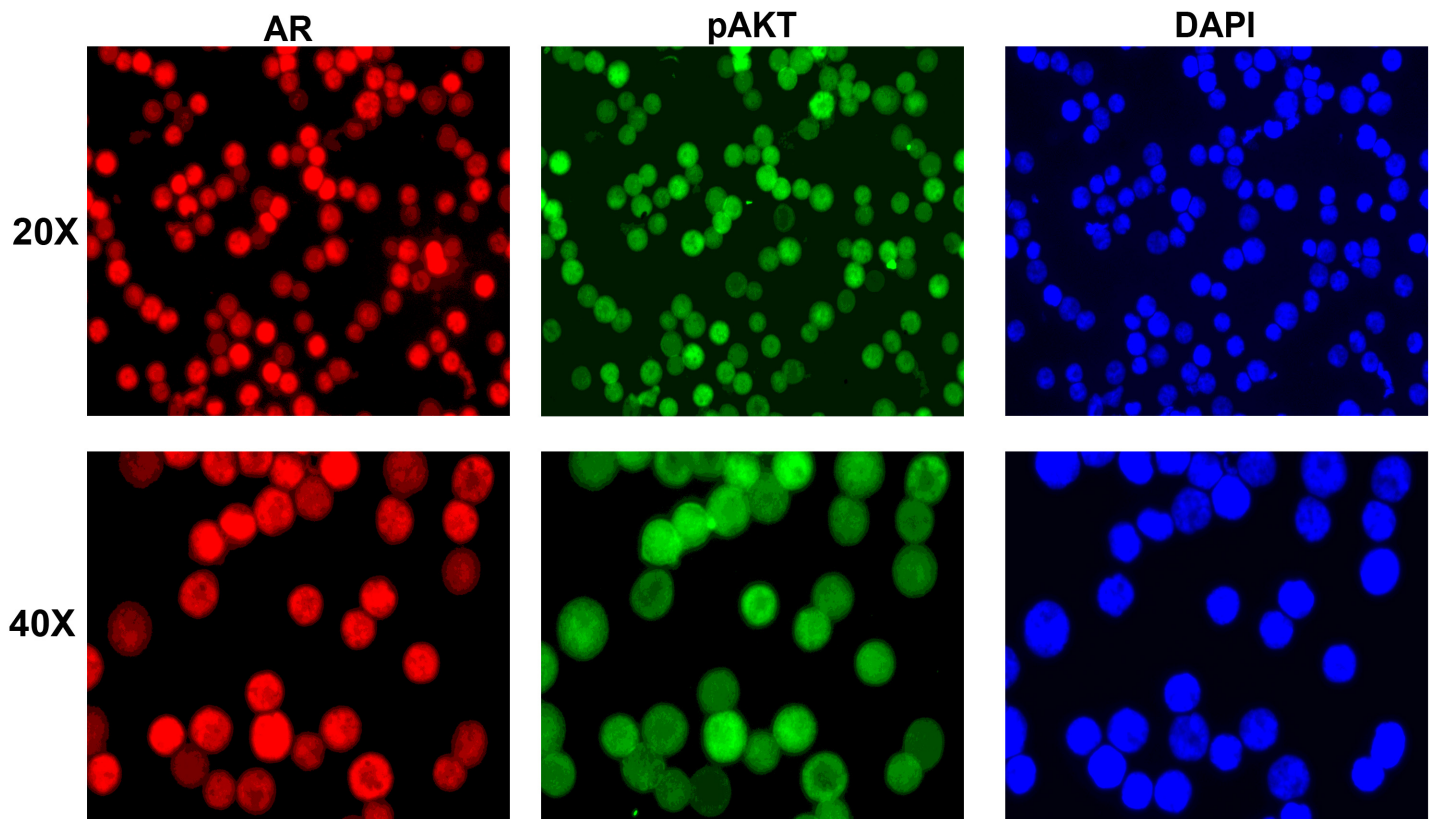

CAL-148

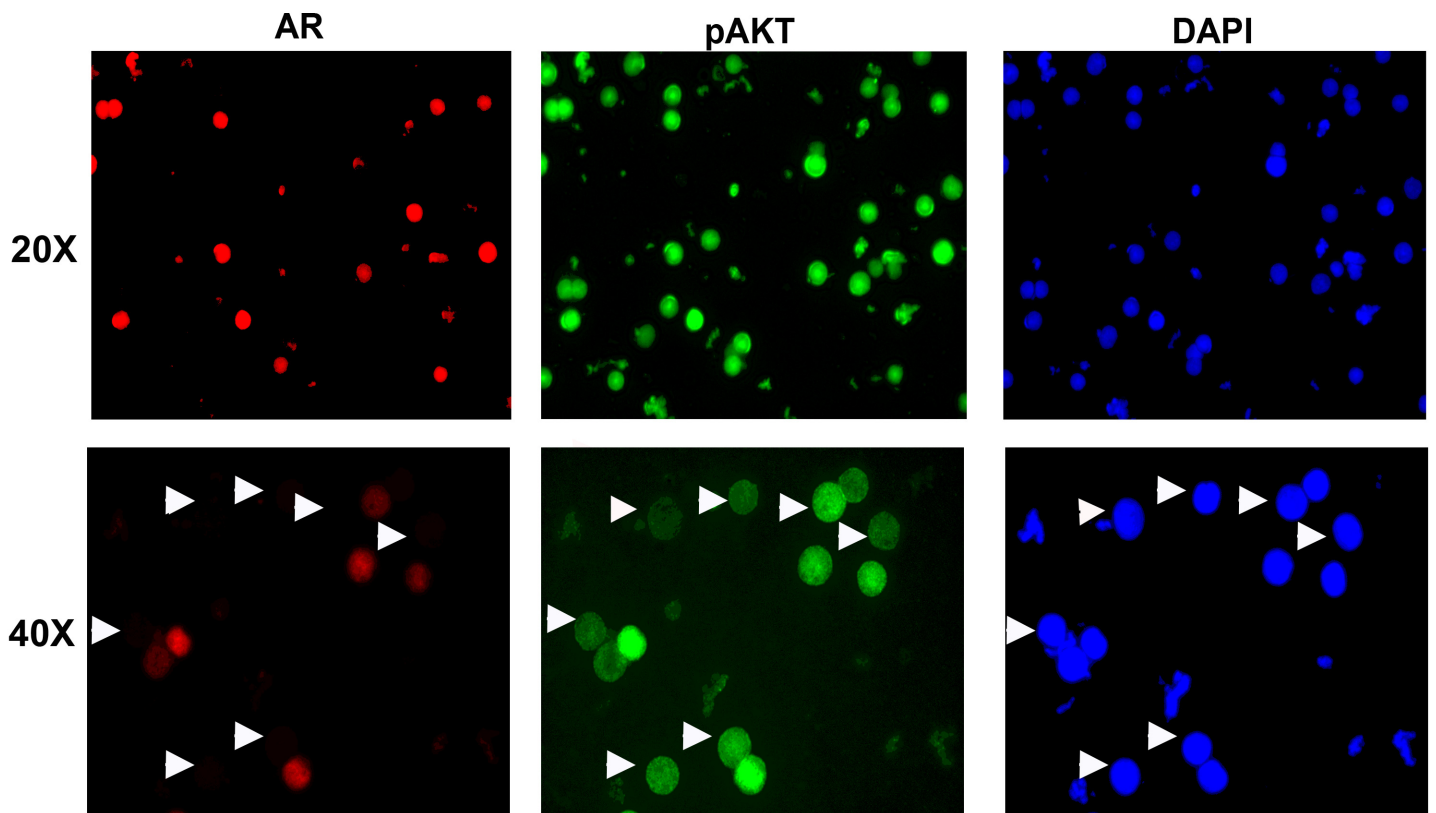

Supplement: MOESM6 [file 9781108]
